# Supplementary material for: Clinical trial transparency: a reassessment of industry compliance with clinical trial registration and reporting requirements in the United States
Source: PubMed Central journal article supplement — BMJ Open. 2017 Sep 23;7(9):e015110. doi: 10.1136/bmjopen-2016-015110 (PMC5623439; doi:10.1136/bmjopen-2016-015110), 2017-09-23
Supplement: bmjopen-2016-015110.reviewer_comments.pdf [file bmjopen-2016-015110.reviewer_comments.pdf]

# Sorry, there is no peer review to display for this article

*BMJ Open* has fully open peer review for all article types. This means that accepted papers usually have their prepublication history posted alongside them on the journal website, [bmjopen.bmj.com](http://bmjopen.bmj.com).

This prepublication history comprises all previous versions of the manuscript, the reviewers' comments, and the authors' responses to all the comments from reviewers and editors.

In rare instances we determine after careful consideration that we should not make certain portions of the prepublication record publicly available. For example, in cases of stigmatised illnesses we seek to protect the confidentiality of reviewers who have these illnesses. In other instances there may be legal or regulatory considerations that make it inadvisable or impermissible to make available certain parts of the prepublication record.

In all instances in which we have determined that elements of the prepublication record should not be made publicly available, we expect that authors will respect these decisions and also will not share this information.
